# Supplementary material
Source: PubMed Central journal article supplement (PMC10020672)
Supplement: mmc1.pdf [file mmc1.pdf]

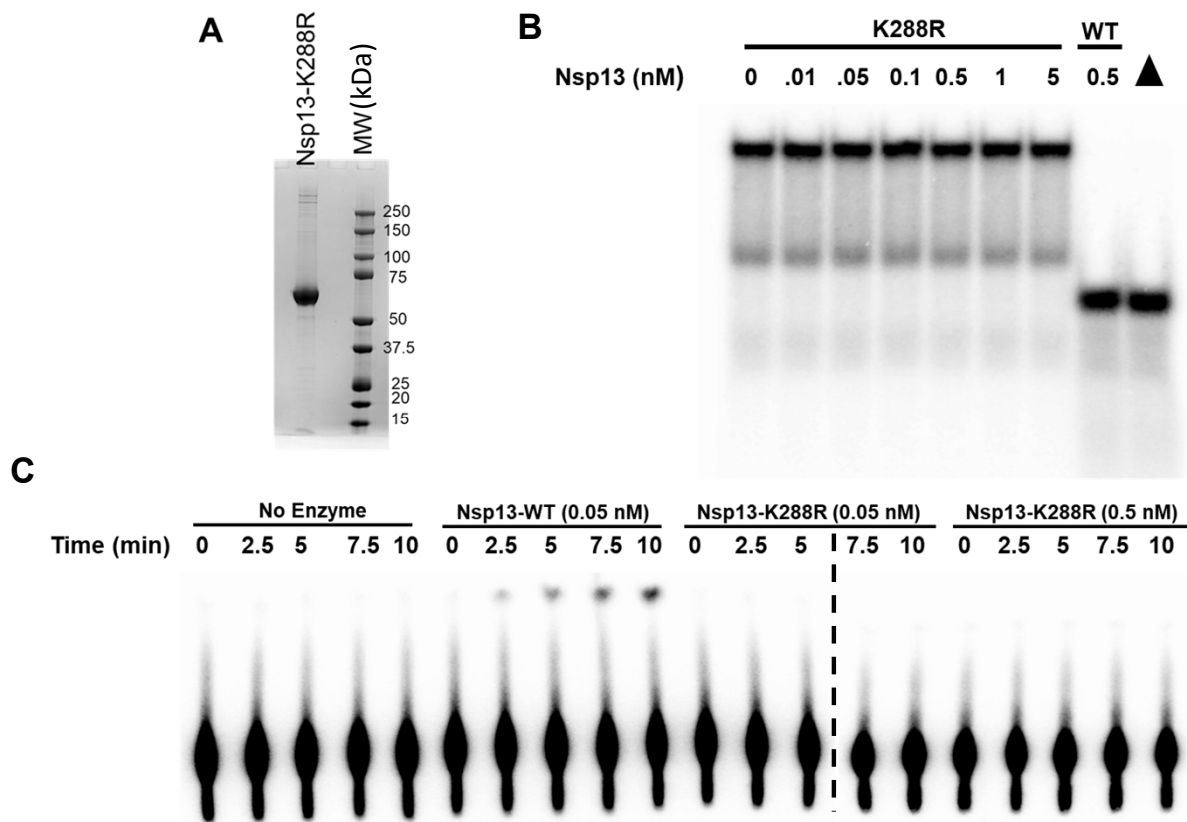

**Fig. S1. Nsp13-K288R mutant protein has no detectable ATPase or helicase activity.** (A) Purified recombinant Nsp13-K288R protein (5,000 ng) after final dialysis (see *Experimental Procedures*), resolved by SDS-PAGE and detected by Coomassie-staining. (B) Representative native polyacrylamide gel analysis of products from Nsp13-K288R reaction mixtures with a 19-bp RNA partial substrate conducted in the presence of 2 mM ATP and 1 mM Mg<sup>2+</sup> for 15 min at 37 °C. Filled triangle represents heat-denatured RNA substrate control. Products from reaction mixture containing Nsp13-WT is shown. (C) Representative thin layer chromatography of a kinetic analysis of Nsp13-K288R (0.05 and 0.5 nM) ATPase activity in the presence of a 60 nt ssRNA effector. The two chromatography sheets containing reactions from one experiment were spliced together and no lanes were omitted.

**Fig. S1**

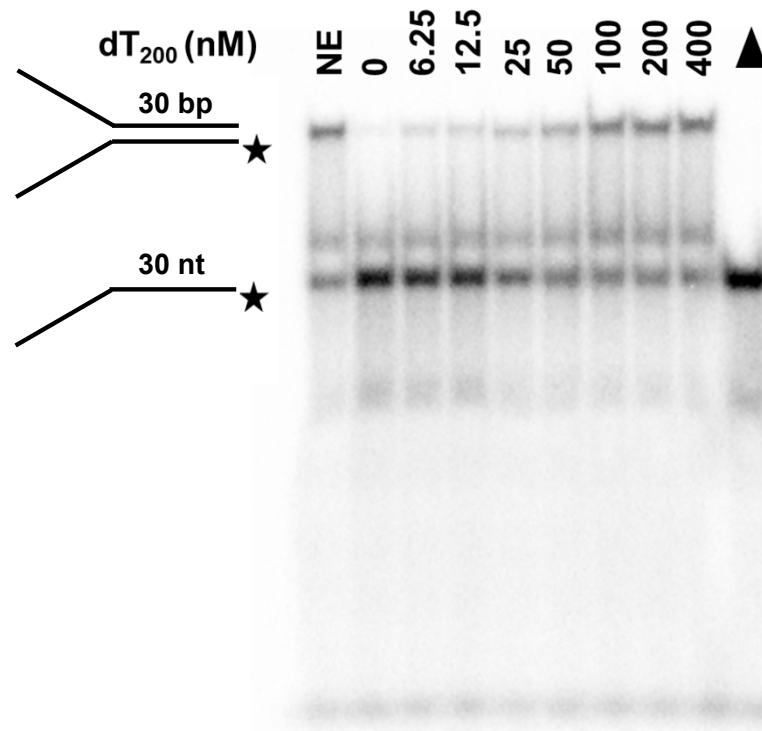

**Fig. S2.  $dT_{200}$  titration to determine polynucleotide concentration suitable for helicase trap in single-turnover kinetic experiments.** The indicated concentrations of  $dT_{200}$  were pre-incubated with Nsp13 (0.1625 nM) for 5 min at RT. Subsequently, ATP and radiolabeled 30-bp RNA partial duplex substrate (0.25 nM) was added to the reaction mixture and allowed to incubate at 37 °C for 60 min. Reactions were quenched and analyzed by native polyacrylamide gel electrophoresis and ImageQuant as described under *Experimental Procedures*.

**Fig. S2**

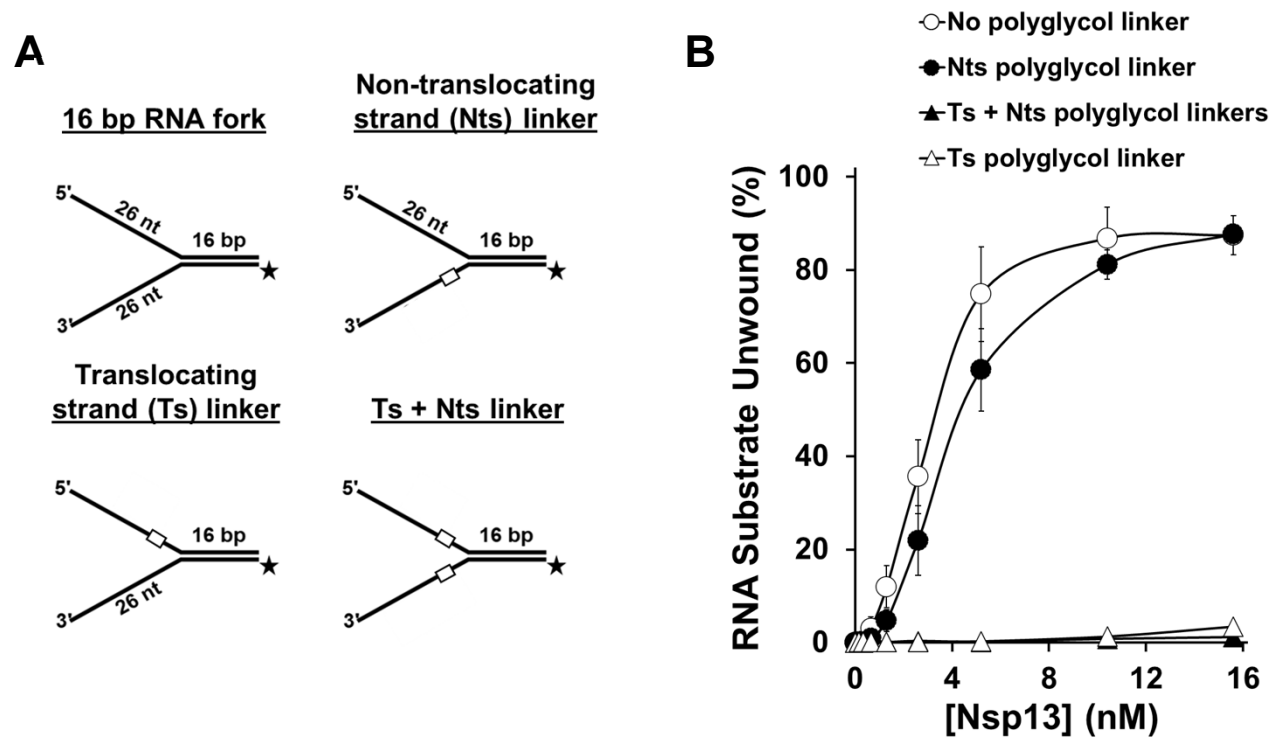

**Fig. S3. Strand-specific inhibition of Nsp13 RNA helicase activity by sugar-phosphate backbone discontinuity.** (A) Depiction of the partial duplex RNA substrates with a polyglycol linker (PGL) in the top or bottom strand. (B) Quantitative assessment of Nsp13 helicase activity from a 15-min incubation at 37 °C as a function of protein concentration in the presence of 2 mM ATP and 5 mM Mg<sup>2+</sup> on the PGL backbone-modified substrates (0.25 nM) shown in (A). Data represent the average of at least three independent experiments with SD indicated by error bars.

**A**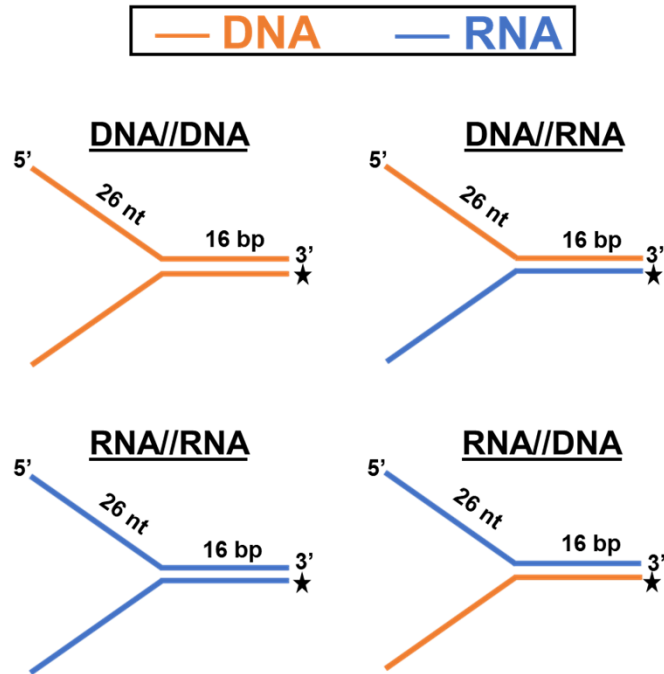**B**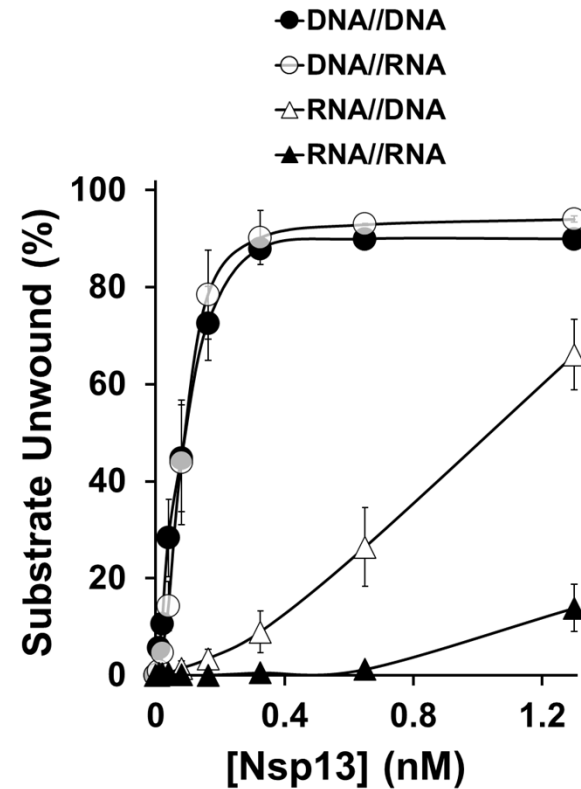

**Fig. S4. Chemical identity of nucleic acid strands dictates Nsp13 helicase unwinding efficiency.** (A) Depiction of the partial duplex substrates with DNA or RNA in the top or bottom strand. (B) Quantitative assessment of Nsp13 helicase activity from a 15-min incubation at 37 °C as a function of protein concentration in the presence of 2 mM ATP and 5 mM Mg<sup>2+</sup> on the nucleic acid substrates (0.25 nM) shown in (A). Data represent the average of at least three independent experiments with SD indicated by error bars.

**Fig. S4**

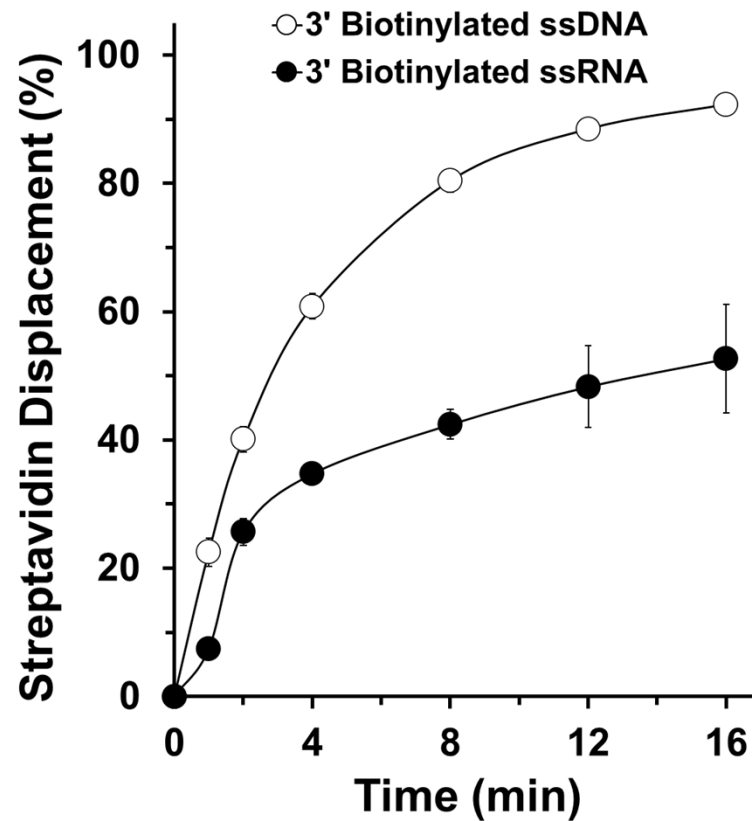

**Fig. S5. Nsp13 disrupts high affinity interaction of streptavidin bound to 3' biotinylated ssDNA or ssRNA.** Quantitative assessment of Nsp13-catalyzed streptavidin displacement kinetic reactions incubated at various time points (1 - 16 min) at 37 °C in the presence of 1 mM MgCl<sub>2</sub> and 2 mM ATP using 39-mer single-stranded RNA and DNA substrates (0.25 nM) with a biotin moiety at the 3' end. Biotinylated oligonucleotide was preincubated with 0.75 nM streptavidin monomer for 10 min and reactions were initiated by the addition of 1 μM biotin immediately followed by Nsp13 (1.6 nM). Data represent the average of at least three independent experiments with SD indicated by error bars.

**Fig. S5**

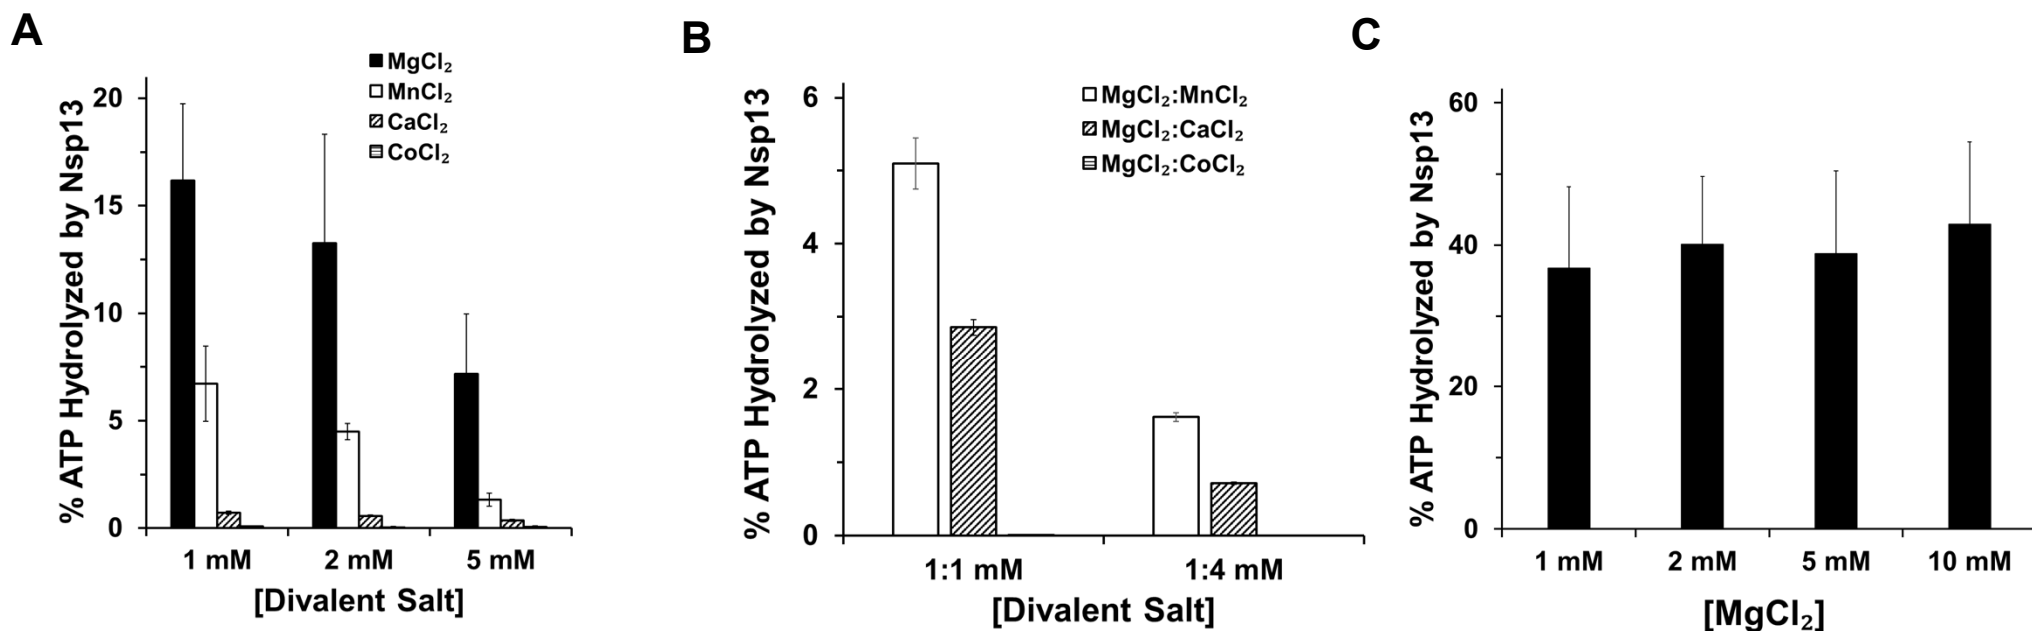

**Fig S6. Effect of Divalent Salts on Nsp13 ATPase Activity.** (A) 0.4 nM Nsp13 was incubated with 1 mM ATP in Nsp13 reaction salts with either MgCl<sub>2</sub>, MnCl<sub>2</sub>, CaCl<sub>2</sub> or CoCl<sub>2</sub> and 1.6 μM 60 nt RNA effector. Reactions were quenched at 0 and 10 minutes. (B) 0.4 nM Nsp13 was incubated with 1 mM ATP in Nsp13 reaction salts with 1.6 μM 60 nt RNA effector and mixtures of divalent salts either in a 1:1 or a 1:4 ratio resulting in a final concentration of either 2 or 5 mM divalent salt in each reaction. (C) 4 nM Nsp13 was incubated with 1 mM ATP in Nsp13 reaction salts with increasing amounts of MgCl<sub>2</sub> in the absence of effector RNA. Reactions from these ATPase assays were quenched at 0 and either 10 (A,B) or 30 (C) minutes and run on PEI-cellulose TLC sheets for 20 minutes in 1M Formic Acid and 0.8 M LiCl. % ATP hydrolyzed was calculated by dividing the released phosphate by the total of ATP and phosphate in each lane. Background from the t=0 was subtracted out from each measurement. Data represent the average of at least three independent experiments with SD indicated by error bars.

**Fig. S6**

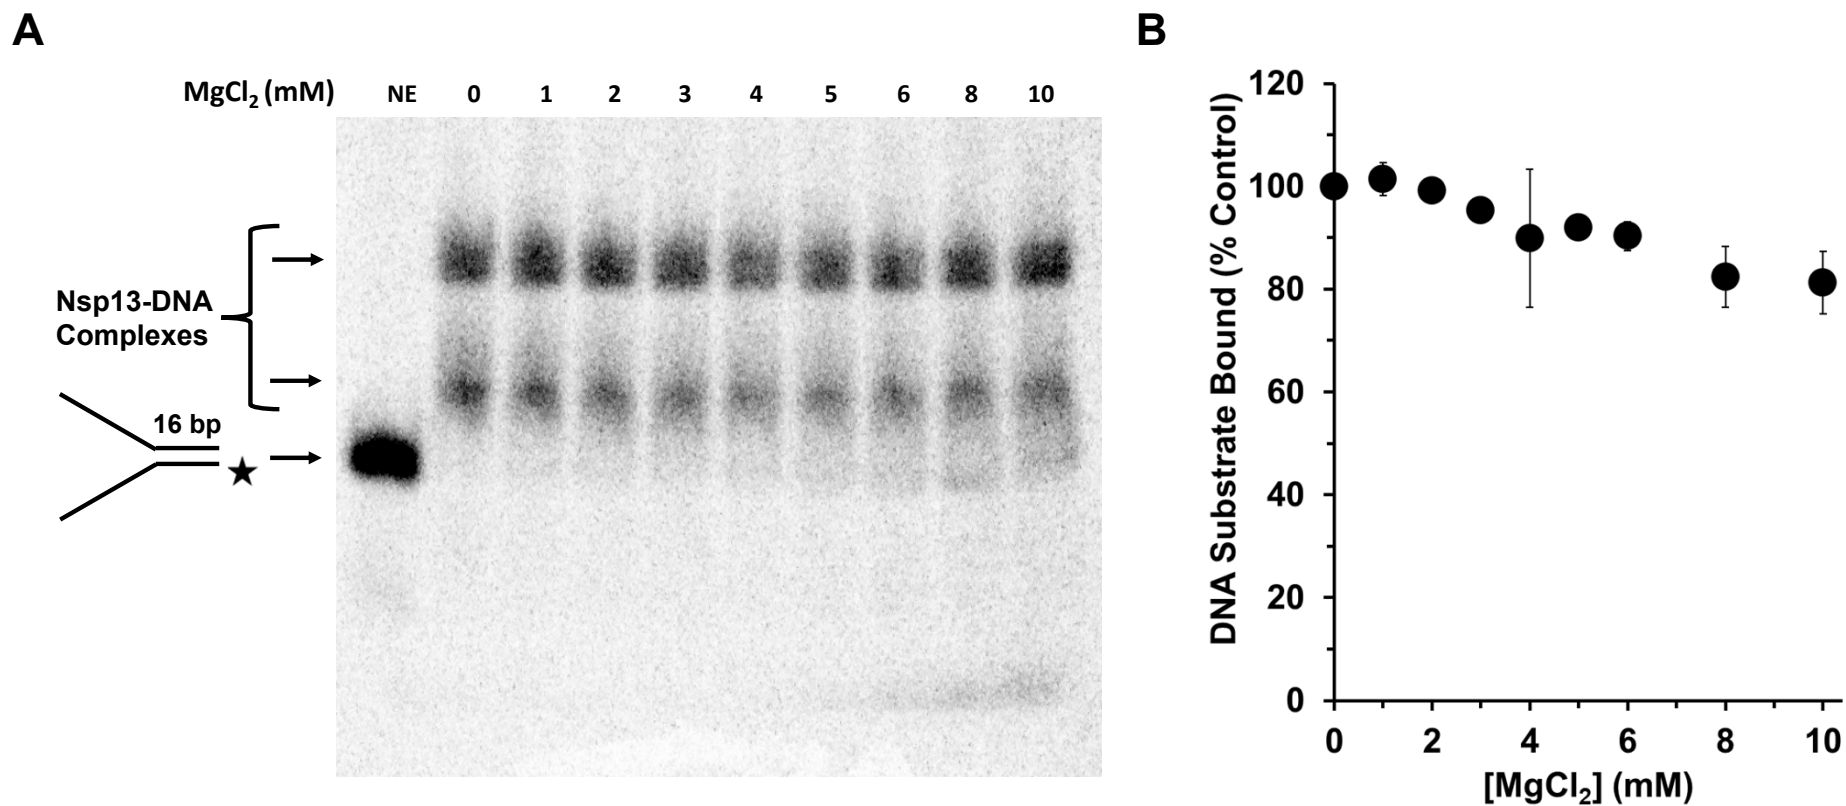

**Fig S7. Effect of MgCl<sub>2</sub> on Nsp13's binding to the DNA substrate.** Nsp13 (2.5 nM) was incubated with the 16-bp DNA forked duplex substrate (0.25 nM) for 15 min at RT. (A) Binding mixtures were assessed by EMSA, as described in *Experimental Procedures*. (B) Quantitative analysis is shown. Data represent average of at least three independent experiments with SD indicated by error bars.

**Fig. S7**





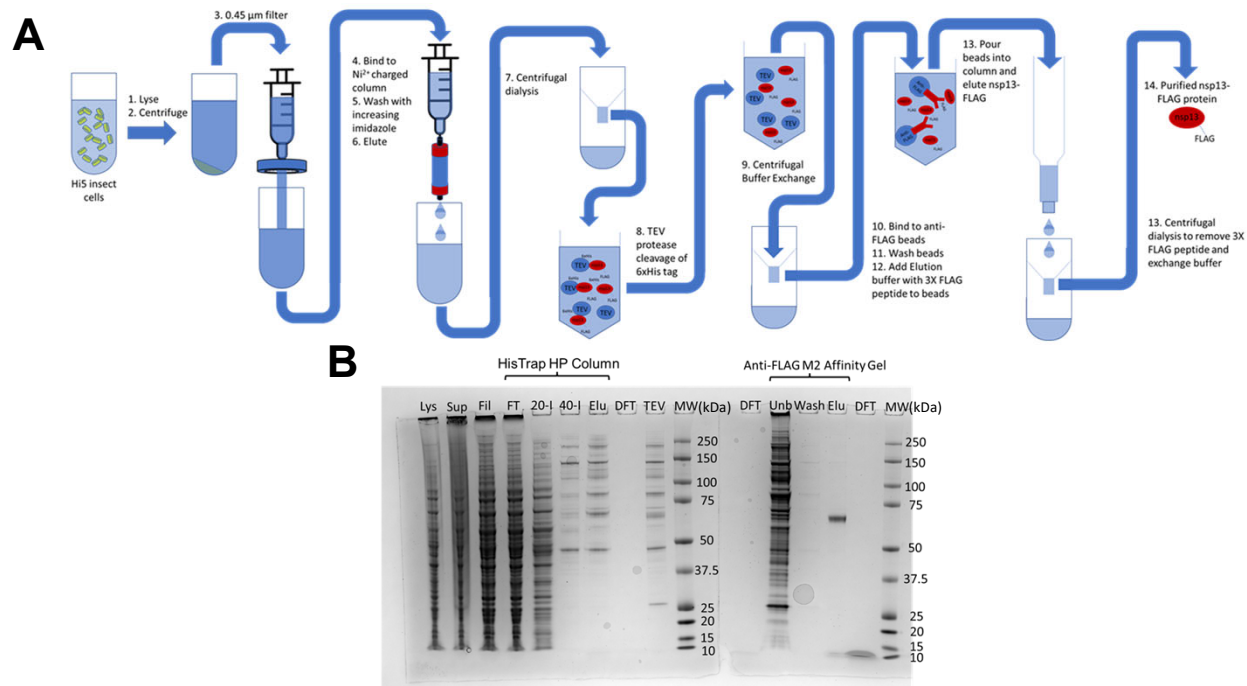

**Fig. S9. Recombinant SARS-CoV-2 Nsp13 purification.** (A) Scheme for purification of recombinant SARS-CoV-2 Nsp13 protein. ① Hi5 insect cells previously infected with baculovirus containing recombinant Nsp13 were lysed and cell debris pelleted after a centrifugation step. ② The supernatant was filtered through a 0.45 micron PVDF filter. ③ The filtered lysate was injected into a 1 ml HisTrap HP column followed by imidazole washes and elution with a high concentration of imidazole. ④ The eluted protein was dialyzed to remove imidazole and high salt using a centrifugal MWCO filter device. ⑤ The 6xHis tag was cleaved off of the Nsp13 using TEV protease overnight at 4°C. ⑥ The cleaved protein was dialyzed to remove β-mercaptoethanol. ⑦ Nsp13 was bound to anti-FLAG beads followed by washes and elution with excess 3XFLAG peptide. ⑧ The elution was poured into a column and eluted Nsp13 was collected. ⑨ The eluted Nsp13 was dialyzed to exchange into the storage buffer and remove any 3XFLAG peptide. (B) Coomassie-stained SDS polyacrylamide gel showing Nsp13 fraction from affinity purification. Lysate (Lys), Supernatant (Sup), Filtered (Fil), 20 mM Imidazole wash (20-I), 40 mM imidazole wash (40-I), Elution (Elu), Dialysis flow-through (DFT), TEV protease cleaved protein (TEV), molecular weight markers (MW), Unbound (UB), washes (Wash). The final dialyzed recombinant Nsp13 protein is shown in Fig. 1.

**Fig. S9**
